# Supplementary material
Source: publisher figshare collection journal article supplement (https://karger.figshare.com/articles/dataset/_/5812917)
Supplement: Supplementary file 1 [file 1]

## Supplementary File 2

| Abbey Pain Scale                                                              |                |                |                                              |                  |
|-------------------------------------------------------------------------------|----------------|----------------|----------------------------------------------|------------------|
| Name of resident _____                                                        |                |                |                                              |                  |
| <b>For measurement of pain in people with dementia who cannot verbalise</b>   |                |                |                                              |                  |
| How to use scale: While observing the resident, score questions 1 to 6        |                |                |                                              |                  |
| Name/designation of person completing the scale _____                         |                |                |                                              |                  |
| Date _____                                                                    |                | Time _____     |                                              |                  |
| Latest pain relief given was _____                                            |                | at _____ hours |                                              |                  |
| <b>Q1 Vocalisation</b>                                                        |                |                | <input type="text"/>                         |                  |
| eg. whimpering, groaning, crying                                              |                |                |                                              |                  |
| Absent 0 Mild 1 Moderate 2 Severe 3                                           |                |                |                                              |                  |
| <b>Q2 Facial expression</b>                                                   |                |                | <input type="text"/>                         |                  |
| eg. looking tense, frowning, grimacing, looking frightened                    |                |                |                                              |                  |
| Absent 0 Mild 1 Moderate 2 Severe 3                                           |                |                |                                              |                  |
| <b>Q3 Change in body language</b>                                             |                |                | <input type="text"/>                         |                  |
| eg. fidgeting, rocking, guarding part of body, withdrawn                      |                |                |                                              |                  |
| Absent 0 Mild 1 Moderate 2 Severe 3                                           |                |                |                                              |                  |
| <b>Q4 Behavioural change</b>                                                  |                |                | <input type="text"/>                         |                  |
| eg. Increased confusion, refusing to eat, alteration in usual patterns        |                |                |                                              |                  |
| Absent 0 Mild 1 Moderate 2 Severe 3                                           |                |                |                                              |                  |
| <b>Q5 Physiological change</b>                                                |                |                | <input type="text"/>                         |                  |
| eg. temperature, pulse or blood pressure outside of normal limits, perspiring |                |                |                                              |                  |
| Absent 0 Mild 1 Moderate 2 Severe 3                                           |                |                |                                              |                  |
| <b>Q6 Physical changes</b>                                                    |                |                | <input type="text"/>                         |                  |
| eg. skin tears, pressure areas, arthritis, contractures, previous injuries    |                |                |                                              |                  |
| Absent 0 Mild 1 Moderate 2 Severe 3                                           |                |                |                                              |                  |
| Add scores for 1–6 and record here                                            |                |                | <b>Total pain score</b> <input type="text"/> |                  |
| Now tick the box that matches the total pain score                            | 0–2<br>No pain | 3–7<br>Mild    | 8–13<br>Moderate                             | 14+<br>Severe    |
|                                                                               |                |                |                                              |                  |
| Finally, tick the box that matches the type of pain                           | Chronic        |                | Acute                                        | Acute on chronic |
|                                                                               |                |                |                                              |                  |

### The Abbey Pain Scale

Source: Abbey J, De Bellis A, Piller N, Esterman A, Giles L, Parker D, Lowcay B. Funded by the JH & JD Gunn Medical Research Foundation 1998–2002
