# Supplementary material
Source: publisher figshare collection journal article supplement (https://karger.figshare.com/articles/dataset/_/5812917)
Supplement: Supplementary file 2 [file 1]

## Supplementary File 1

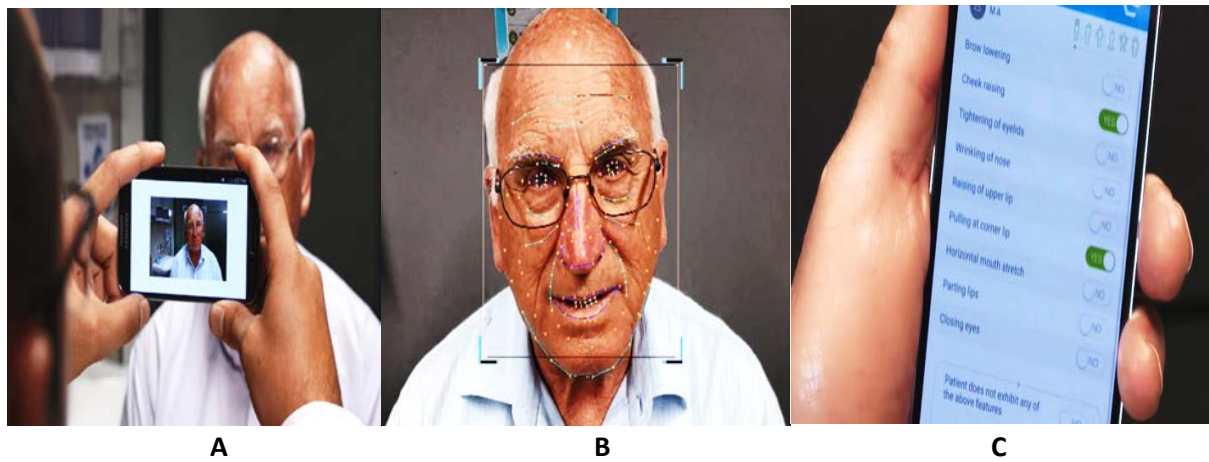

Steps of automated facial expression analysis

(A: finding the face; B: extraction of facial features; C: AU detection)
